# Supplementary material for: Metformin Use Is Associated with Decreased Mortality in COVID-19 Patients with Diabetes: Evidence from Retrospective Studies and Biological Mechanism
Source: MDPI journal article supplement (doi:10.3390/jcm10163507), 2021-08-09
Supplement: s1 [file s1]

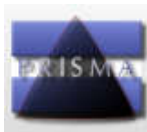

## PRISMA 2009 Flow Diagram

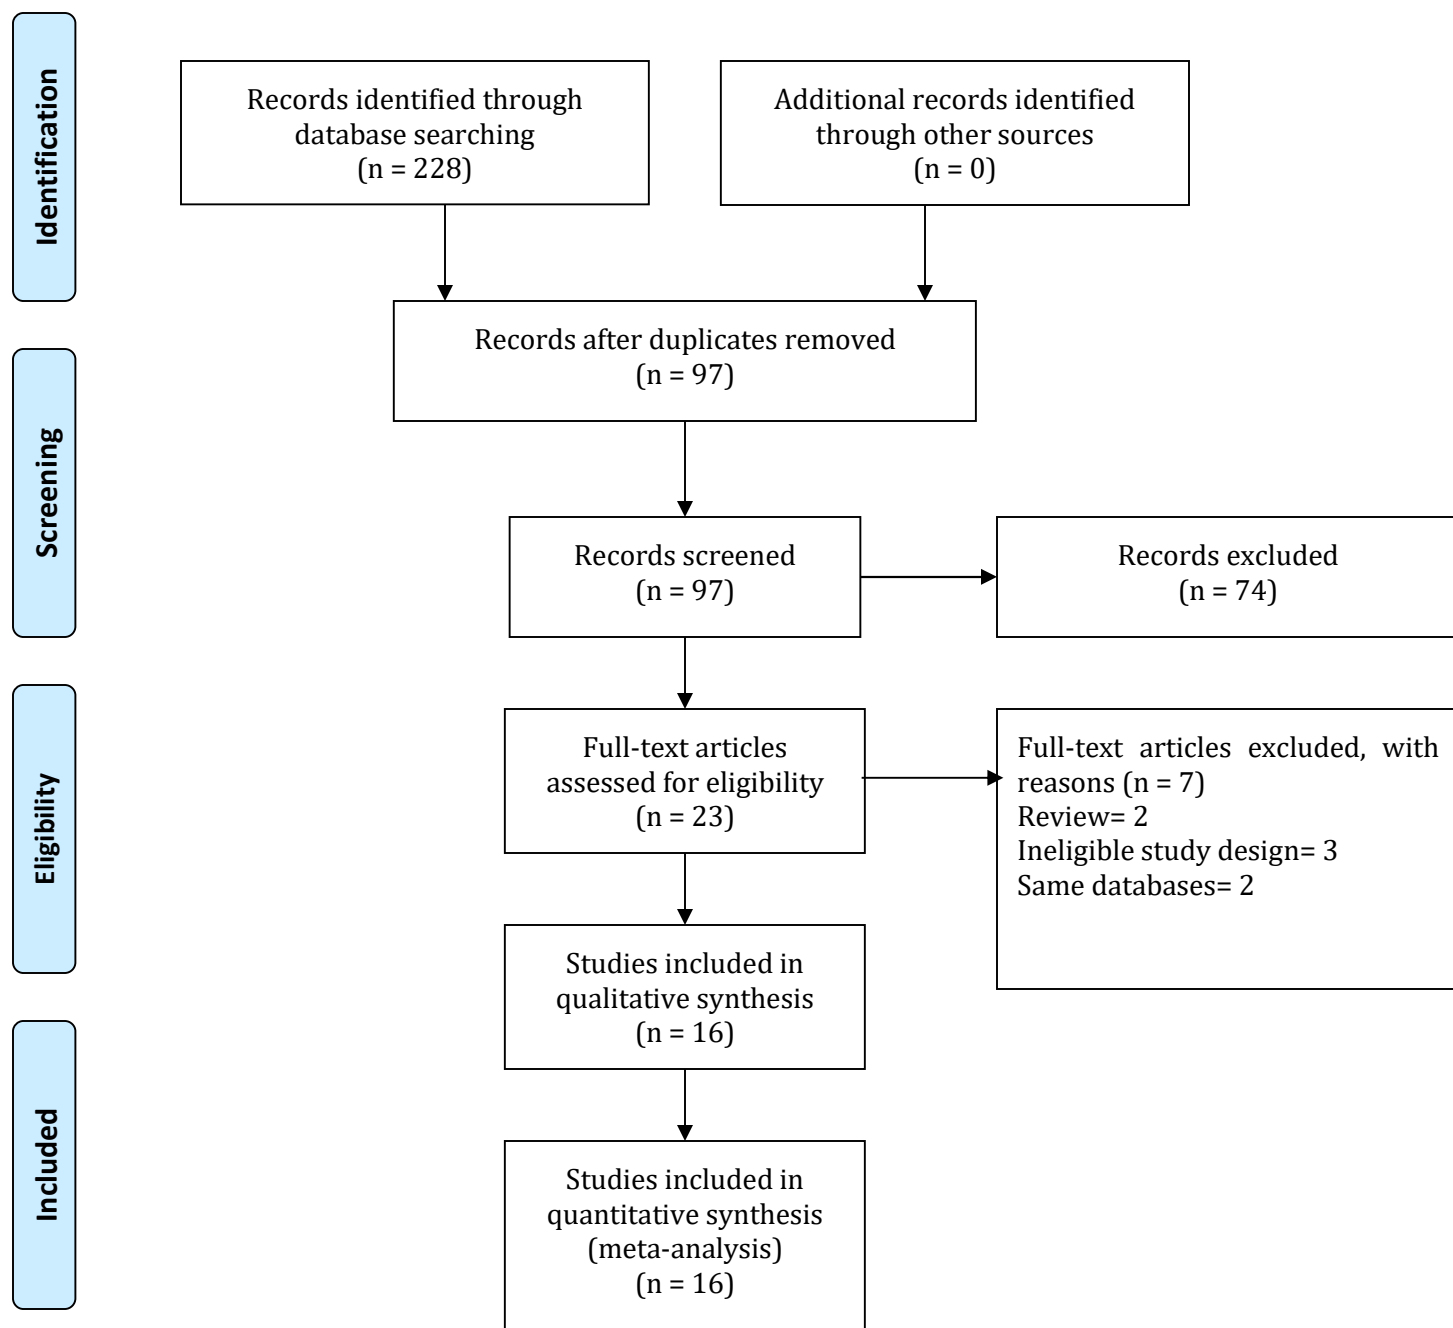

Supplementary Figure S1. Searching strategy.

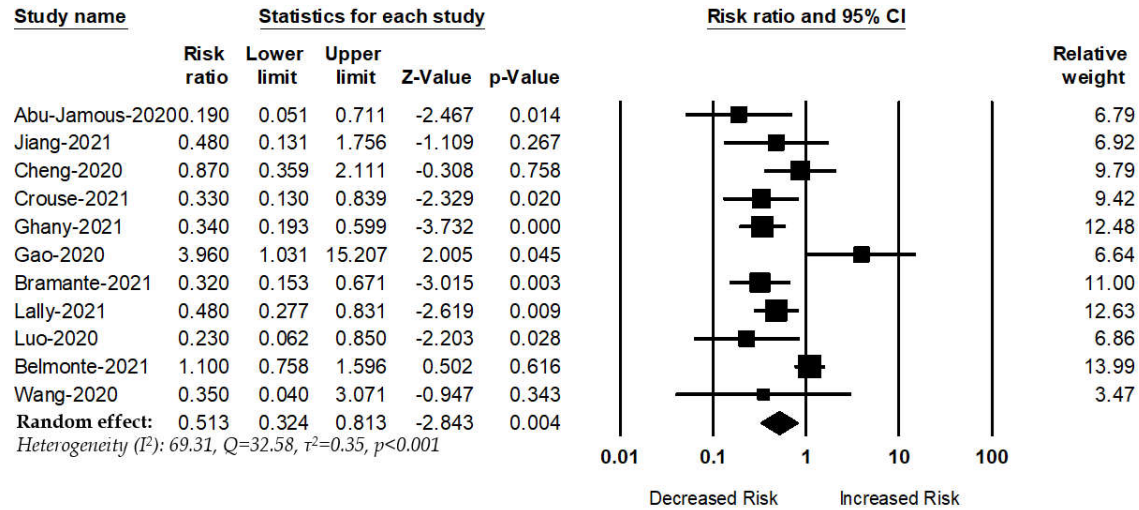

**Figure S2.** Metformin use and the risk of mortality of patients with COVID-19 (Studies included metformin users less than 1000 participants).

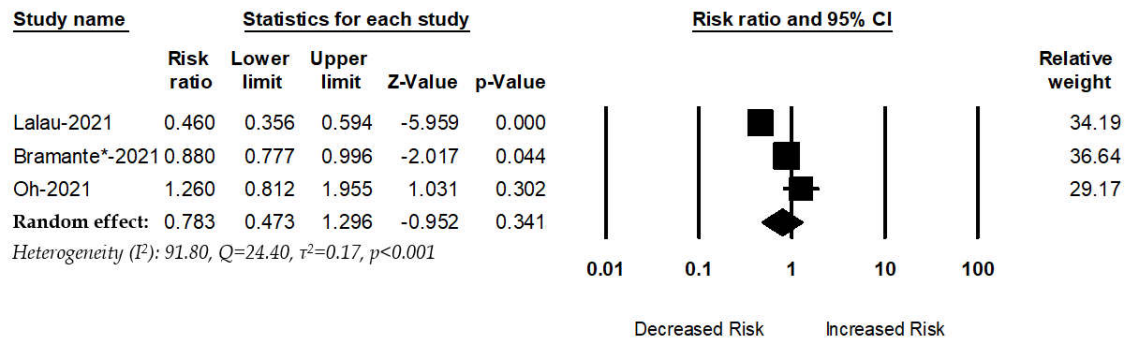

**Figure S3.** Metformin use and the risk of mortality of patients with COVID-19 (Studies included metformin users between 1000 and 10,000 participants).

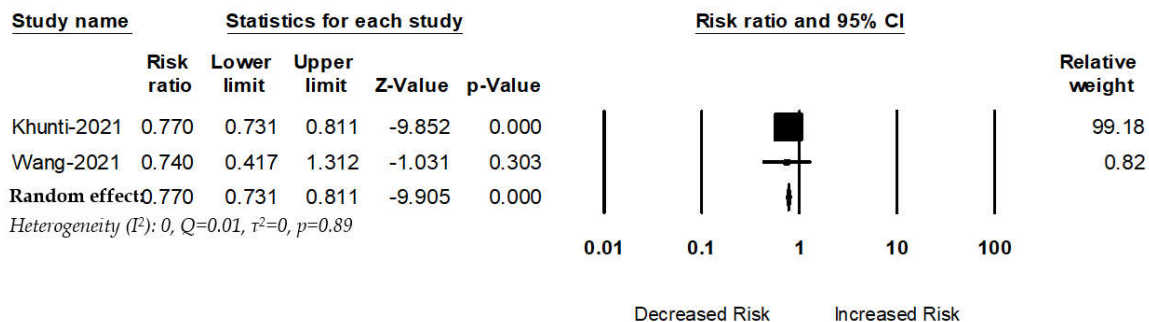

**Figure S4.** Metformin use and the risk of mortality of patients with COVID-19 (Studies included metformin users more than 10,000 participants).
